# Supplementary material for: Evidence for absence of bilateral transfer of olfactory learned information in Apis dorsata and Apis mellifera
Source: Oxford University Press journal article supplement (doi:10.1242/jeb.196584), 2019-01-01
Supplement: jeb196584supp.pdf [file jeb196584supp.pdf]

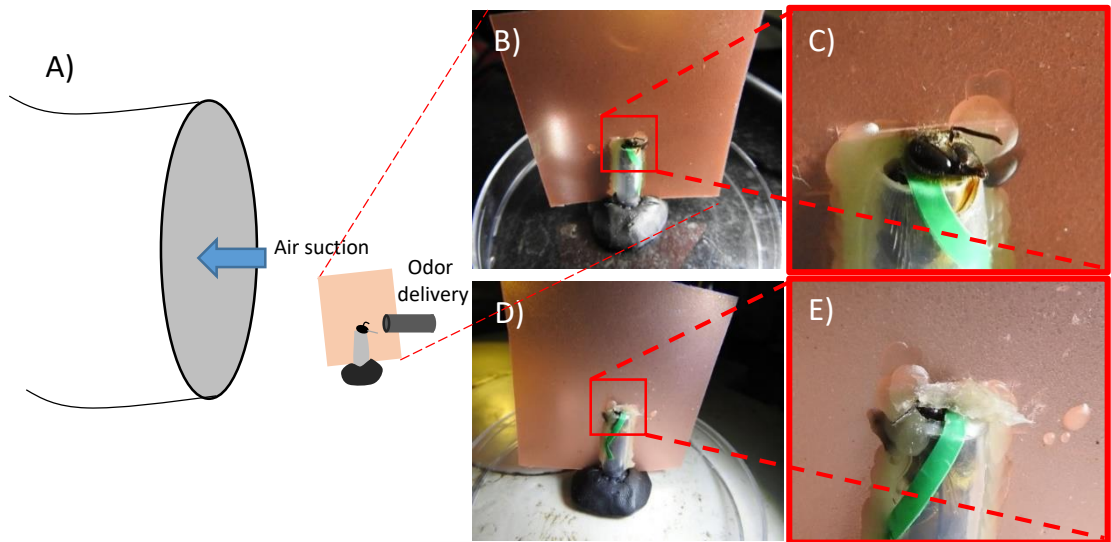

**Figure S1. Setup for training with partition,** A) Schematic representation of the setup with a wall B) The view of the training side of the bee with the animal's mandible, proboscis and one antenna to one side. C) A magnified view of the training side. D) The view of the untrained side, with the untrained antenna separated from the training side. E) A magnified view of the untrained side.

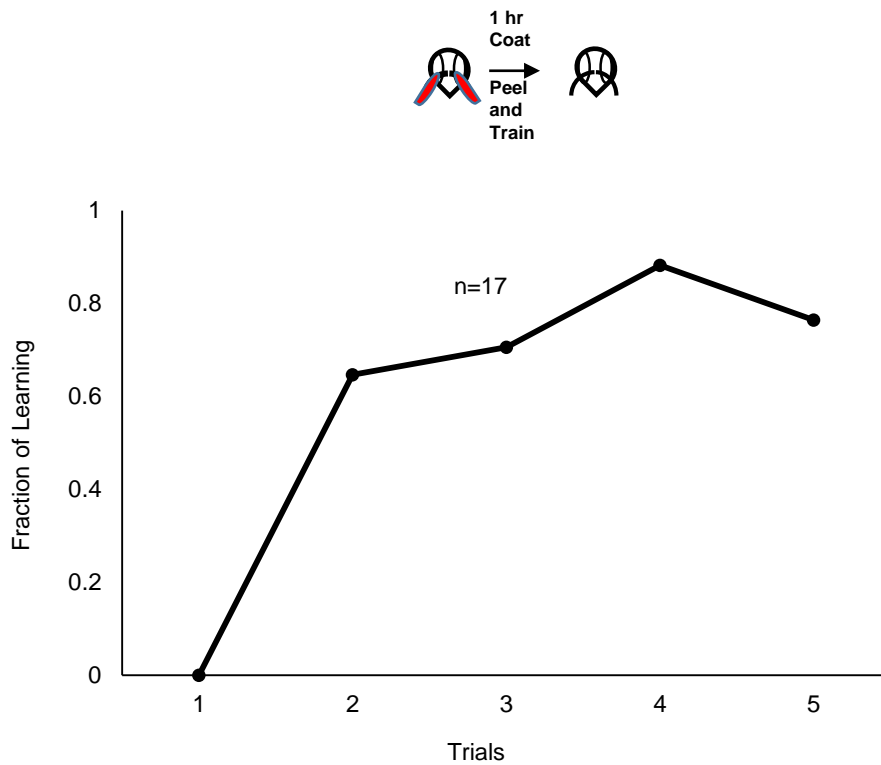

**Figure S2. Acrylic paint coat does not cause damage to the antennae:** In *Apis dorsata* bees (n=17) the coating with acrylic paint and peeling does not harm the antennae and the bees learnt as well as their open antennae counterparts. Final learning rate achieved in these bees was 76% and was not significantly different from the learning rate of the both antenna open bees (Cochran's  $q=0.8$ ,  $p=0.3$ ).
